# Supplementary material for: Surrogate endpoints in advanced sarcoma trials: a meta-analysis
Source: PubMed Central journal article supplement (PMC6195375; doi:10.18632/oncotarget.26166), 2018-10-02
Supplement: oncotarget-09-34617-s001.pdf [file oncotarget-09-34617-s001.pdf]

## Surrogate endpoints in advanced sarcoma trials: a meta-analysis

### SUPPLEMENTARY MATERIALS

**Supplementary Table 1: Number of events observed for progression-free survival, time-to-progression and time-to-treatment failure after 6 and 12 months of follow-up; All trials (Ntrial = 15; Npatient = 2846)\***

| Follow-up | Endpoint | Number of events |
|-----------|----------|------------------|
| 6 months  | TTP      | 1629             |
|           | TTF      | 1646             |
|           | PFS      | 1693             |
| 12 months | TTP      | 2226             |
|           | TTF      | 2245             |
|           | PFS      | 2303             |

\*PFS = progression-free survival; TTF = time-to-treatment failure; TTP = time-to-progression.

**Supplementary Table 2: Number of events observed for progression-free survival, time-to-progression and time-to-treatment failure after 6 and 12 months of follow-up; Trials with doxorubicin- or ifosfamide-based control arm, first-line setting (Ntrial = 11; Npatient = 2243)**

| Folow-up  | Endpoint | Number of events |
|-----------|----------|------------------|
| 6 months  | TTP      | 1203             |
|           | TTF      | 1220             |
|           | PFS      | 1264             |
| 12 months | TTP      | 1695             |
|           | TTF      | 1714             |
|           | PFS      | 1768             |

\*PFS = progression-free survival; TTF = time-to-treatment failure; TTP = time-to-progression.
